# Supplementary material
Source: PubMed Central journal article supplement (PMC4587683)

## ***Supplemental figures and tables***

**Supplemental table 1:** Detailed clinical data for patients with drug-free long-term graft function (TOL), kidney recipients with stable graft function under standard immunosuppression (STA) and healthy volunteers (HV).

**Supplemental Figure 1: B cells GzmB expression before and after activation.** (A) Dot plot of secretion of GzmB by unstimulated B cells at day 0 and stimulated B cells at day 3 of coculture with CD4<sup>+</sup>CD25<sup>-</sup> T cells. (B) Percentage of GzmB<sup>+</sup> B cells at day 0 and day 3 in HV (n=6), TOL (n=6) and STA (n=6) (\*\*p<0.01; \*\*\*p<0.005). (C) Dot plot of secretion of GzmB by stimulated B cells at day 3 of coculture with CD4<sup>+</sup>CD25<sup>-</sup> T cells in HV, TOL and STA.

**Supplemental Figure 2: Comparative expression of B-cell regulatory molecules (A, B) and tolerance-related markers (C, D) across B-cell (A, C) and PBMC samples (B, D).** For each subset (A, B, C, D), gene expression data are represented by a heat map in which each row represents a gene, and each column represents a sample from the Healthy Volunteer (HV), Tolerant (TOL) or Stable patient (STA) group. Each cell in the matrix corresponds to an expression level, with red for over-expression, green for under-expression, and black for gene expression close to the median (see green/red color scale). For each gene, the absolute expression (see purple color scale, Quartile) and the significance of the variations (1: TOL vs. STA; 2: TOL vs. HV; 3: STA vs. HV) between groups (see blue color scale, P-value) are given. Diamond (◆) shows preferential expression in B-cell subsets.

**Supplemental figure 3: Absolute number of blood B cells.** Number of B cells per μL of blood in HV (n=6), TOL (n=9) and STA (n=6) (\* p<0.05).

# Supplemental table 1

|     |            | Age (years) | Gender | Previous episode of acute rejection | Lymphoma status, cancer | Episode of acute infection (CMV) | Time between graft and analysis (months) | Creatinemia (umol/L) | Proteinuria g/24h | Donor (living vs deceased) | Number of HLA mismatches | Medical treatment | Medical treatment before immunosuppression withdrawal | Time between immunosuppression withdrawal and analysis (years) | Reason of immunosuppression withdrawal | Ab aHLA          | Donor specific Abs |  |
|-----|------------|-------------|--------|-------------------------------------|-------------------------|----------------------------------|------------------------------------------|----------------------|-------------------|----------------------------|--------------------------|-------------------|-------------------------------------------------------|----------------------------------------------------------------|----------------------------------------|------------------|--------------------|--|
| TOL |            | 68,9        | M      | 0,0                                 | 0,0                     | 1,0                              | 325,2                                    | 112,0                | 0,04              | NLD                        | 4,0                      | 0,0               | AZA+CNI+CS                                            | 13,0                                                           | uncompliance                           | -                | -                  |  |
|     |            | 58,2        | F      | 2,0                                 | 1,0                     | 1,0                              | 244,0                                    | 87,0                 | ND                | NLD                        | 3,0                      | 0,0               | CC+CNI+CS                                             | 19,0                                                           | Csa toxicity                           | + (CL II)        | + (CL II)          |  |
|     |            | 47,7        | M      | 0,0                                 | 0,0                     | 0,0                              | 180,6                                    | 103,0                | 0,04              | LD                         | 0,0                      | 0,0               | CC+CNI+CS                                             | 13,0                                                           | uncompliance                           | -                | -                  |  |
|     |            | 61,2        | F      | 0,0                                 | 0,0                     | 1,0                              | 358,4                                    | 71,0                 | 0,09              | LD                         | 0,0                      | 0,0               | AZA+CNI+CS                                            | 12,0                                                           | uncompliance                           | -                | -                  |  |
|     |            | 59,2        | M      | 0,0                                 | 0,0                     | 0,0                              | 197,3                                    | 280,0                | 0,10              | LD                         | 0,0                      | 0,0               | CNI+CS                                                | 13,0                                                           | uncompliance                           | -                | -                  |  |
|     |            | 49,8        | F      | 0,0                                 | 0,0                     | 0,0                              | 136,6                                    | 80,0                 | 0,19              | NLD                        | 1,0                      | 0,0               | MMF+CNI+CS                                            | 9,0                                                            | uncompliance                           | + (CL I - CL II) | -                  |  |
|     |            | 85,3        | M      | 0,0                                 | 0,0                     | 1,0                              | 246,4                                    | 144,0                | 0,36              | NLD                        | 3,0                      | 0,0               | CNI+CS                                                | 8,0                                                            | uncompliance                           | -                | -                  |  |
|     |            | 56,8        | F      | 0,0                                 | 1,0                     | 1,0                              | 261,9                                    | 66,0                 | 0,10              | NLD                        | 4,0                      | 0,0               | CNI+AZA                                               | 4,0                                                            | PTLD                                   | + (CL II)        | -                  |  |
|     |            | 50,8        | M      | 1,0                                 | 0,0                     | 1,0                              | 385,3                                    | 79,0                 | 0,08              | NLD                        | 4,0                      | 0,0               | AZA+CS                                                | 18,0                                                           | uncompliance                           | -                | -                  |  |
|     |            | 44,8        | M      | 0,0                                 | 0,0                     | 0,0                              | 168,5                                    | 205,0                | 0,59              | NLD                        | 0,0                      | 0,0               | CC+CNI                                                | 5,0                                                            | meningo-encephalitis                   | -                | -                  |  |
|     |            | 61,0        | F      | 0,0                                 | 0,0                     | 1,0                              | 147,8                                    | 93,0                 | 0,00              | NLD                        | 4,0                      | 0,0               | CC+CNI                                                | 7,0                                                            | uncompliance                           | -                | -                  |  |
|     |            | 31,4        | F      | 0,0                                 | 0,0                     | 0,0                              | 71,4                                     | 75,0                 | 0,00              | LD                         | 0,0                      | 0,0               | CC+CNI                                                | 1,0                                                            | uncompliance                           | + (CL II)        | ND                 |  |
|     |            | <b>Mean</b> | 58,0   | 6F/12                               | 0,0                     | 0,0                              | 220,6                                    | 90,0                 | 0,10              | 4LD/12                     | 3,0                      |                   |                                                       | 10,5                                                           |                                        |                  |                    |  |
|     |            | <b>SD</b>   | 15,8   |                                     | 0,3                     | 0,4                              | 0,5                                      | 94,9                 | 64,7              | 0,20                       |                          |                   |                                                       | 5,5                                                            |                                        |                  |                    |  |
|     |            | <b>min</b>  | 31,4   |                                     | 0,0                     | 0,0                              | 71,4                                     | 66,0                 | 0,00              |                            |                          |                   |                                                       | 1,0                                                            |                                        |                  |                    |  |
|     | <b>max</b> | 85,3        |        | 2,0                                 | 1,0                     | 385,3                            | 280,0                                    | 0,59                 |                   |                            |                          |                   | 19,0                                                  |                                                                |                                        |                  |                    |  |
| STA |            | 51,9        | F      | 0,0                                 | 0,0                     | 1,0                              | 129,0                                    | 81,0                 | 0,10              | NLD                        | 5,0                      | CNI+CS            |                                                       |                                                                |                                        | -                | -                  |  |
|     |            | 53,7        | M      | 0,0                                 | 0,0                     | 0,0                              | 97,0                                     | 112,0                | 0,16              | LD                         | 4,0                      | CS+CC             |                                                       |                                                                |                                        | -                | -                  |  |
|     |            | 44,1        | M      | 0,0                                 | 0,0                     | 0,0                              | 63,4                                     | 164,0                | 0,14              | NLD                        | 4,0                      | CNI+CC            |                                                       |                                                                |                                        | -                | -                  |  |
|     |            | 60,6        | M      | 0,0                                 | 0,0                     | 0,0                              | 98,0                                     | 102,0                | 0,14              | NLD                        | 5,0                      | CNI+CC            |                                                       |                                                                |                                        | -                | -                  |  |
|     |            | 47,0        | M      | 0,0                                 | 0,0                     | 1,0                              | 140,7                                    | 93,0                 | 0,16              | NLD                        | 1,0                      | CS+CC             |                                                       |                                                                |                                        | + (CL II)        | -                  |  |
|     |            | 54,0        | M      | 0,0                                 | 0,0                     | 1,0                              | 192,5                                    | 132,0                | 0,05              | NLD                        | 4,0                      | CNI+CS            |                                                       |                                                                |                                        | + (CL II)        | -                  |  |
|     |            | 71,3        | M      | 0,0                                 | 0,0                     | 1,0                              | 133,7                                    | 175,0                | 0,14              | NLD                        | 5,0                      | CNI+CC            |                                                       |                                                                |                                        | -                | -                  |  |
|     |            | 40,4        | M      | 0,0                                 | 0,0                     | 0,0                              | 95,5                                     | 92,0                 | 0,24              | NLD                        | 2,0                      | CNI+CC            |                                                       |                                                                |                                        | -                | -                  |  |
|     |            | 52,8        | M      | 1                                   | 0,0                     | 0,0                              | 93,1                                     | 146,0                | 0,24              | NLD                        | 5,0                      | CNI+CC+CS         |                                                       |                                                                |                                        | + (CL II)        | -                  |  |
|     |            | 44,1        | M      | 0,0                                 | 0,0                     | 1,0                              | 142,6                                    | 131,0                | 0,11              | NLD                        | 1,0                      | CNI               |                                                       |                                                                |                                        | -                | -                  |  |
|     |            | 61,3        | M      | 0,0                                 | 0,0                     | 0,0                              | 89,0                                     | 133,0                | 0,20              | NLD                        | 4,0                      | CNI+CC            |                                                       |                                                                |                                        | -                | -                  |  |
|     |            | 66,3        | F      | 1                                   | 0,0                     | 1,0                              | 66,4                                     | 74,0                 | 0,04              | NLD                        | 5,0                      | CNI+CS            |                                                       |                                                                |                                        | -                | -                  |  |
|     |            | 74,9        | F      | 0,0                                 | 1                       | 1,0                              | 143,8                                    | 88,0                 | 0,18              | NLD                        | 4,0                      | CNI+CC            |                                                       |                                                                |                                        | -                | -                  |  |
|     |            | 59,8        | M      | 0,0                                 | 0,0                     | 0,0                              | 115,9                                    | 149,0                | 0,00              | NLD                        | 3,0                      | CNI+CC            |                                                       |                                                                |                                        | -                | -                  |  |
|     |            | 53,5        | F      | 0,0                                 | 0,0                     | 0,0                              | 109,7                                    | 100,0                | 0,04              | NLD                        | 4,0                      | CNI+CC            |                                                       |                                                                |                                        | -                | -                  |  |
|     |            | 71,5        | M      | 0,0                                 | 0,0                     | 0,0                              | 124,8                                    | 117,0                | 0,04              | NLD                        | 5,0                      | CNI+CC            |                                                       |                                                                |                                        | + (CL I)         | -                  |  |
|     |            | 55,4        | F      | 0,0                                 | 0,0                     | 1,0                              | 182,9                                    | 115,0                | 0,08              | NLD                        | 2,0                      | CNI+CS            |                                                       |                                                                |                                        | + (CL II)        | -                  |  |
|     |            | <b>Mean</b> | 57,7   | 5F/17                               | 0,0                     | 0,0                              | 0,5                                      | 120,4                | 124,0             | 0,10                       | 1LD/17                   | 4,0               |                                                       |                                                                |                                        |                  |                    |  |
|     |            | <b>SD</b>   | 10,8   |                                     | 0,4                     | 0,3                              | 0,5                                      | 37,6                 | 29,1              | 0,10                       |                          | 1,4               |                                                       |                                                                |                                        |                  |                    |  |
|     |            | <b>min</b>  | 40,4   |                                     | 0,0                     | 0,0                              | 0,0                                      | 66,4                 | 74,0              | 0,00                       |                          | 1,0               |                                                       |                                                                |                                        |                  |                    |  |
|     | <b>max</b> | 74,9        |        | 1,0                                 | 1,0                     | 1,0                              | 192,5                                    | 175,0                | 0,24              |                            | 5,0                      |                   |                                                       |                                                                |                                        |                  |                    |  |

# Supplemental figure 1

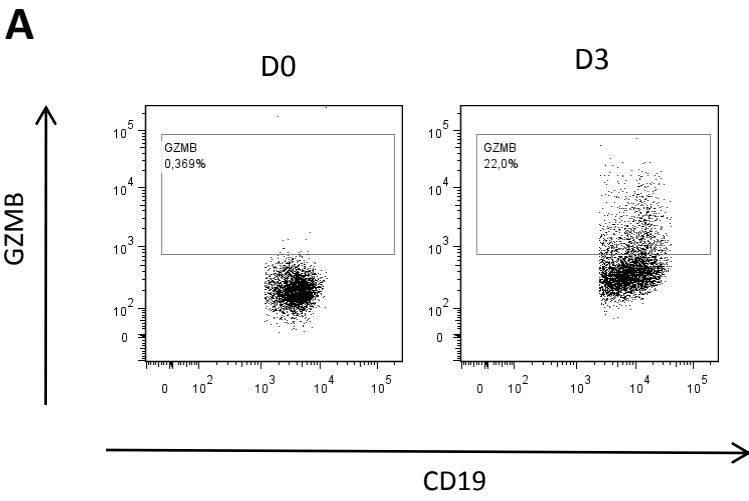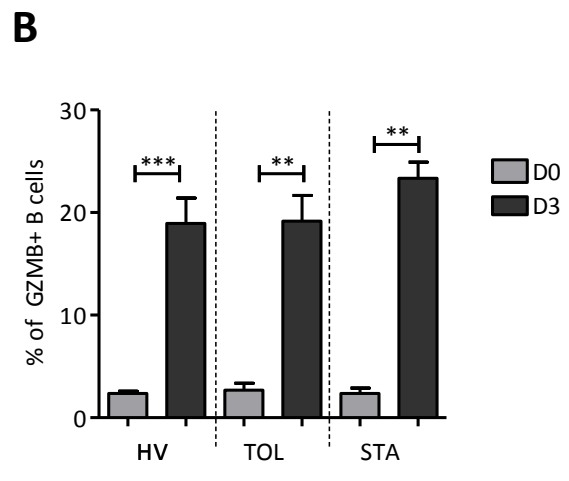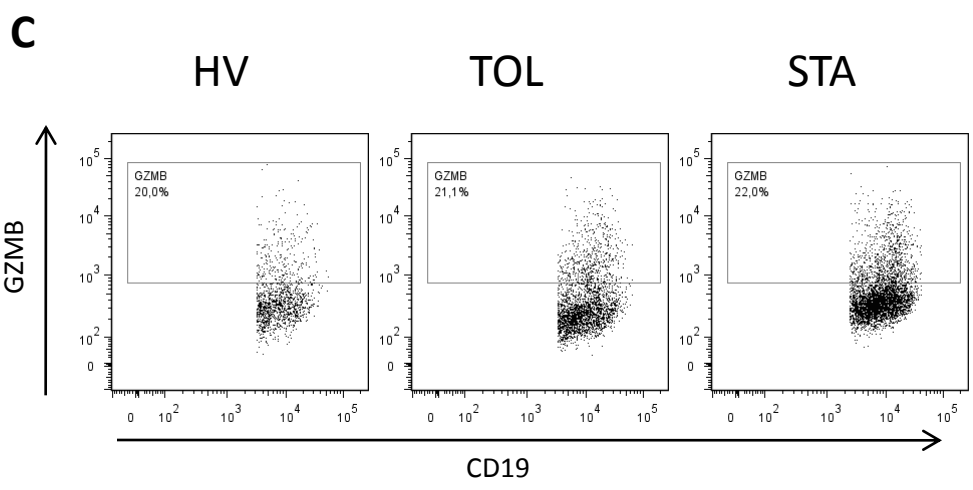

# Supplemental figure 2

**A**

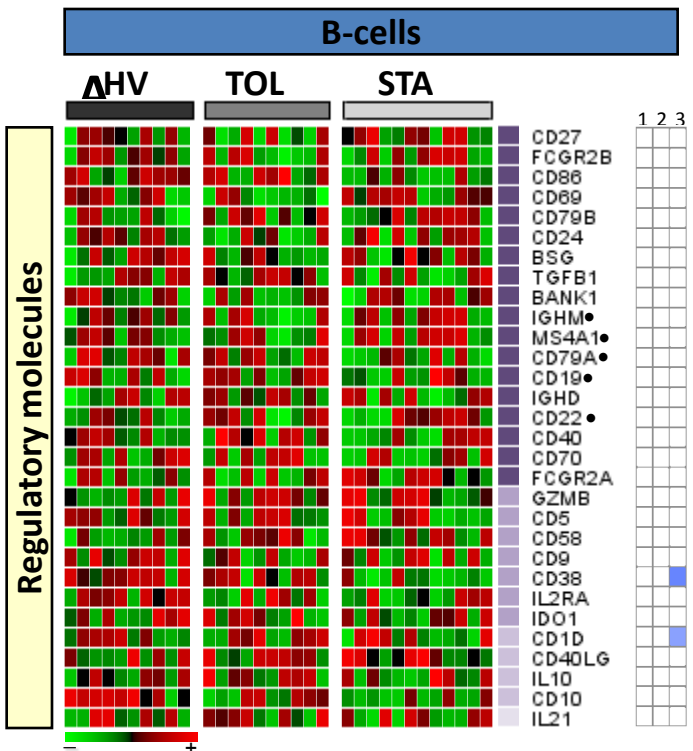

**B**

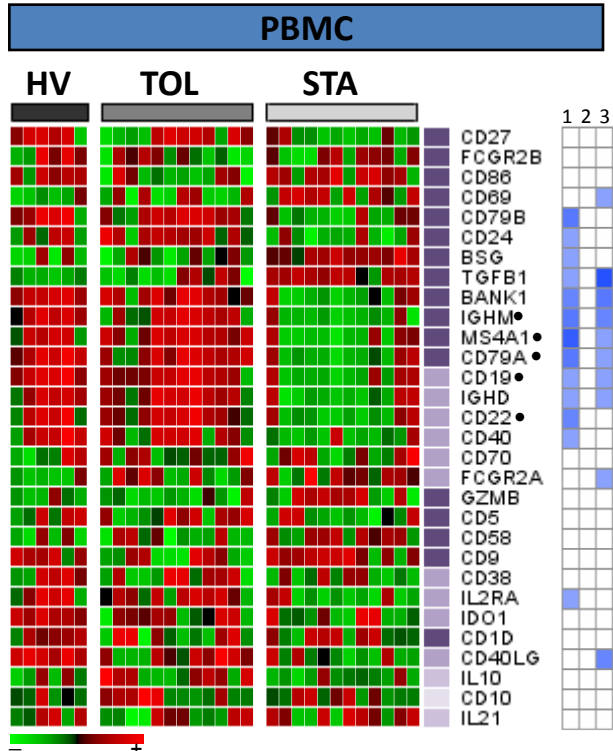

**C**

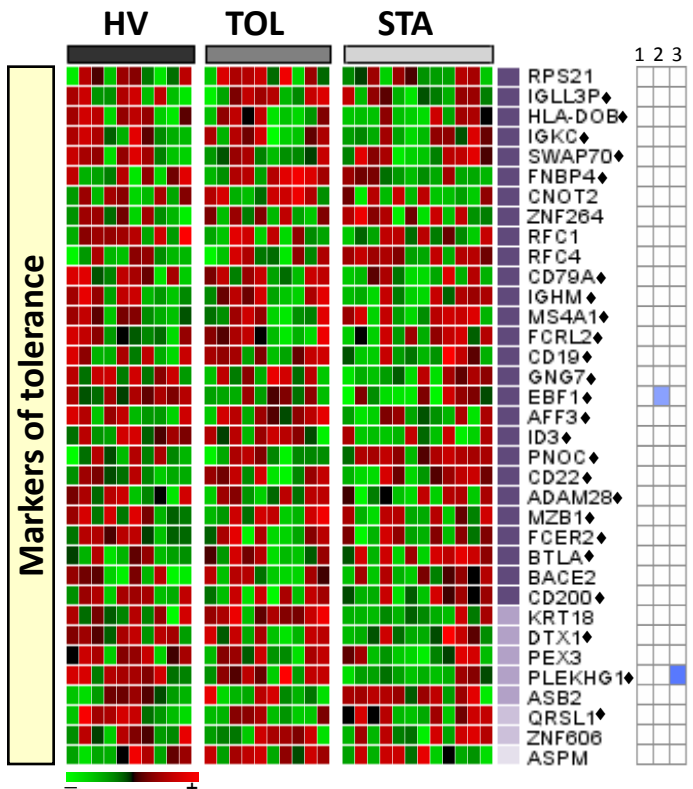

**D**

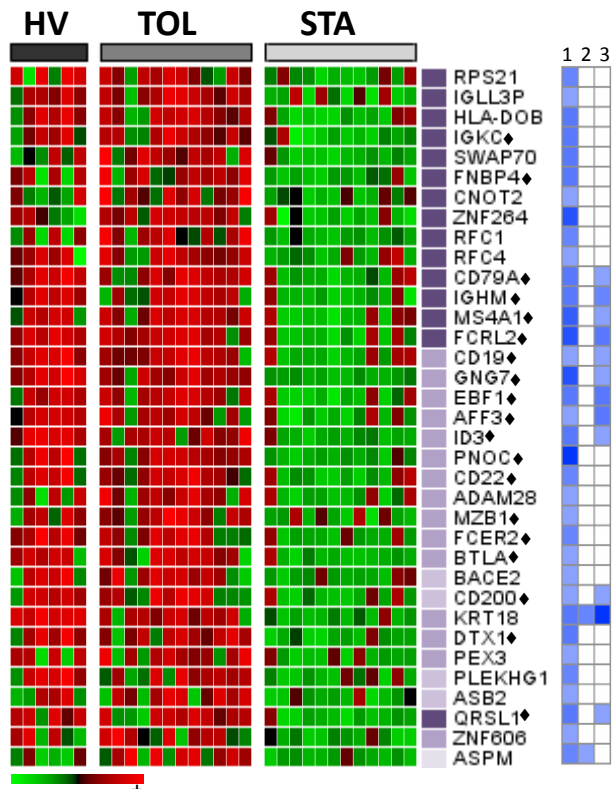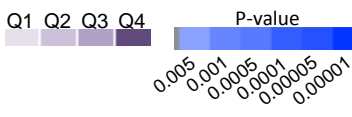

# Supplemental figure 3

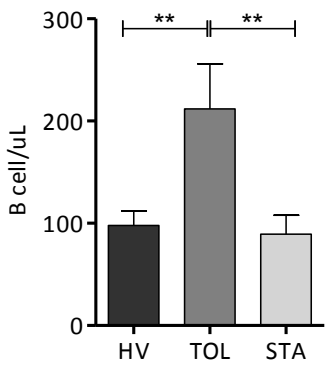

Supplement: ASN.2014040404_ASN2014040404SupplementaryData.pdf [file ASN.2014040404_ASN2014040404SupplementaryData.pdf]
